# Supplementary material
Source: PubMed Central journal article supplement (PMC3471722)
Supplement: supp_M112.374611_jbc.M112.374611-1.pdf [file supp_M112.374611_jbc.M112.374611-1.pdf]

## Supplemental Data

**Figure S1. MiR-214 expression levels and p53 status in ovarian cell lines.** (A) qRT-PCR analysis was performed with specific miR-214 primers in indicated cell lines. (B) The list of p53 status in ovarian cancer cell lines.

**Figure S2. MiR-214 regulates OCSC in wild-type p53 ovarian cancer cells.** (A - C) Indicated cell lines were transfected with pre-miR-214 or ASO miR-214 and control oligo. After 72 h of transfection, cells were subjected to CD133 labeling (upper panels of A), qRT-PCR analysis of miR-214 expression level (bottom panels of A) and ALDEFLUOR analysis (B, C)

**Figure S3. MiR-214 does not affect sphere growth in mutant p53 cells OV8 and SKOV3.** Cells were plated in ultra-negative attachment 6-well plate (5,000 viable cells/well) and were grown in a serum-free sphere culture medium for 12 days. Sphere numbers were counted under microscopy.

**Figure S4. Knockdown of miR-214 overcomes chemoresistance in ALDH1-positive cells.** ALDH1-positive and -negative cells were isolated from A2780S and OV2008 cells by flow sorting and were analyzed for miR-214 levels by qRT-PCR. The ALDH1-positive cells were transfected with antisense of miR-214 (A). The cells were treated with or without CDDP (B) and doxorubicin (C). After 24 h of treatment, cells were subjected to MTT assay. Data shown are mean  $\pm$  SD for each experimental group and all the experiments were repeated 3 times in triplicate.

**Figure S5. MiR-214 does not regulate Nanog in mutant p53 cells.** Indicated cells were transfected with pre-miR-214 (A) or ASO miR-214 (B) as well as control oligo. Following incubation of 72 h, cells were subjected to immunoblot and RT-PCR analyses.

**Figure S6. P53 expression was negatively regulated by miR-214.** (A) qRT-PCR and Western blot analyses show inverse correlation of miR-214 and p53 levels in a majority ovarian cancer cell lines examined. (B) OV2008 and A2780 cells were transfected with indicated oligos and then immuno-stained with p53 antibody after 48 h of transfection.

**Figure S7. MiR-214 represses the expression of p53 and its downstream targets.** OVCA433 cells were infected with lenti-miR-214 and lenti-miR vectors. After selection with puromycin, 3 stable miR-214 clonal cell lines were subjected to immunoblot analysis with indicated antibodies.

**Figure S8. Nanog is regulated by miR-214 in wild-type p53 cells.** OV10 cells were transfected with indicated oligos and then subjected to RT-PCR (upper panels) and immunoblot analyses (bottom panels).

**Figure S9. ALDH-positive cells express CSC markers.** ALDH-negative and -positive cells were sorted and then immunoblotted with indicated antibodies.

**Figure S10. MiR-214 represses p53 but does not induce Nanog expression in p53-mutant cells.** OV3 and A2780CP cells were transfected with pre-miR-214 (left) and ASO miR-214 (right), respectively. After incubation for 72 h, cells were analyzed by immunoblot (upper panels) and semi-quantitative RT-PCR (bottom panels) for p53 and Nanog expression.

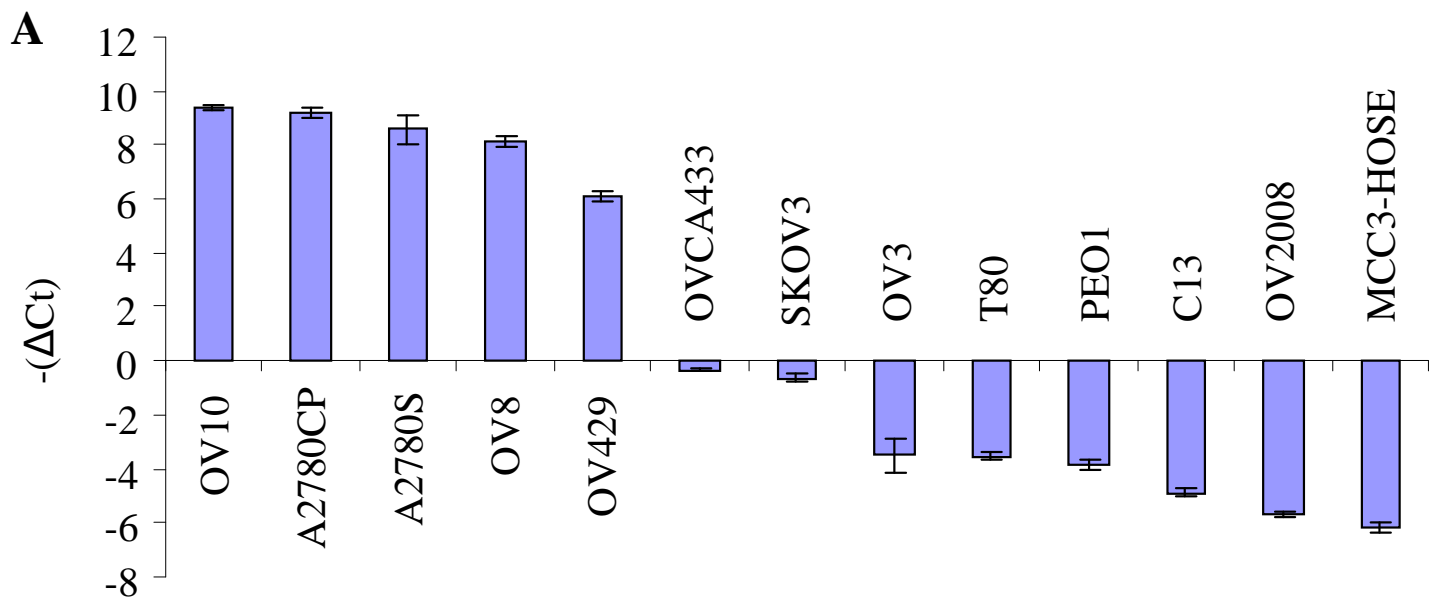

**B**

| Cell line | p53 status |
|-----------|------------|
| A2780S    | Wild type  |
| OV10      | Wild type  |
| OV433     | Wild type  |
| OV2008    | Wild type  |
| OV429     | Wild type  |
| A2780CP   | Mutation   |
| OV 8      | Mutation   |
| OV 3      | Mutation   |
| SKOV 3    | Null       |
| C13       | Wild type  |
| PEO1      | Mutation   |

Figure S1

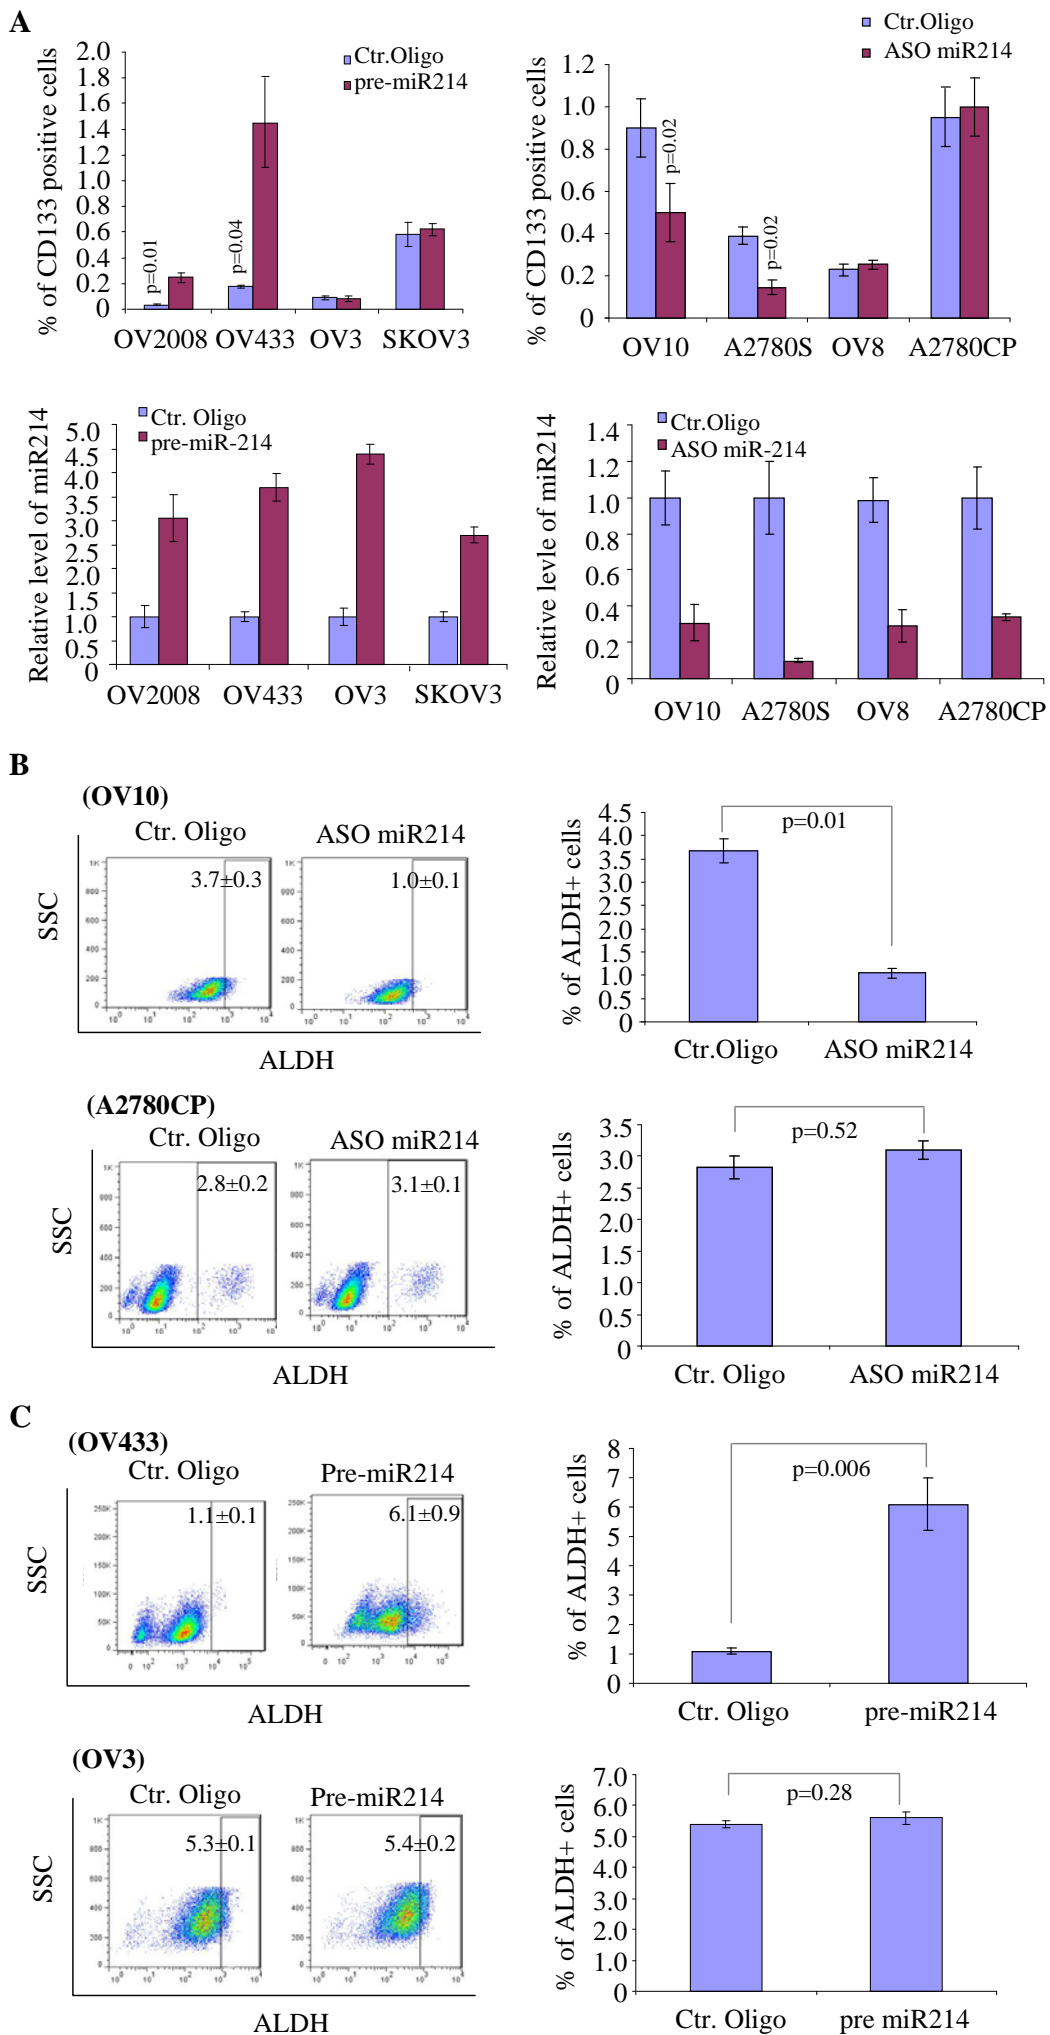

Figure S2

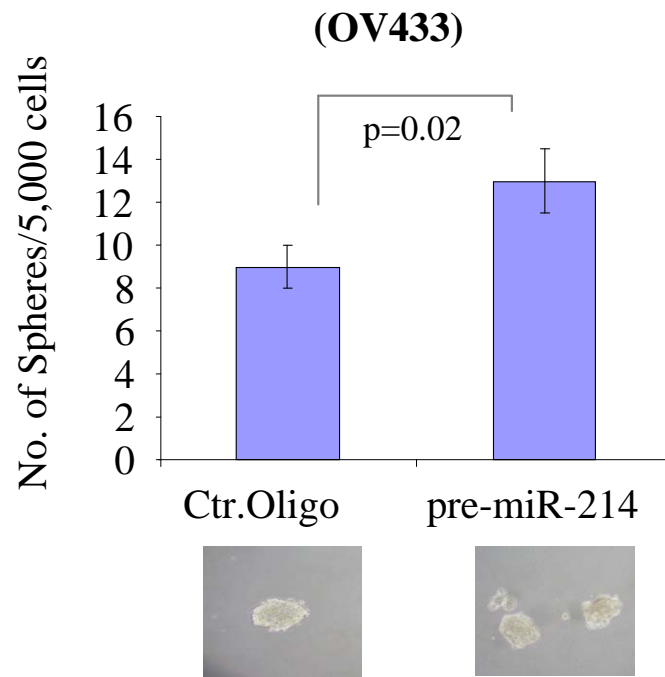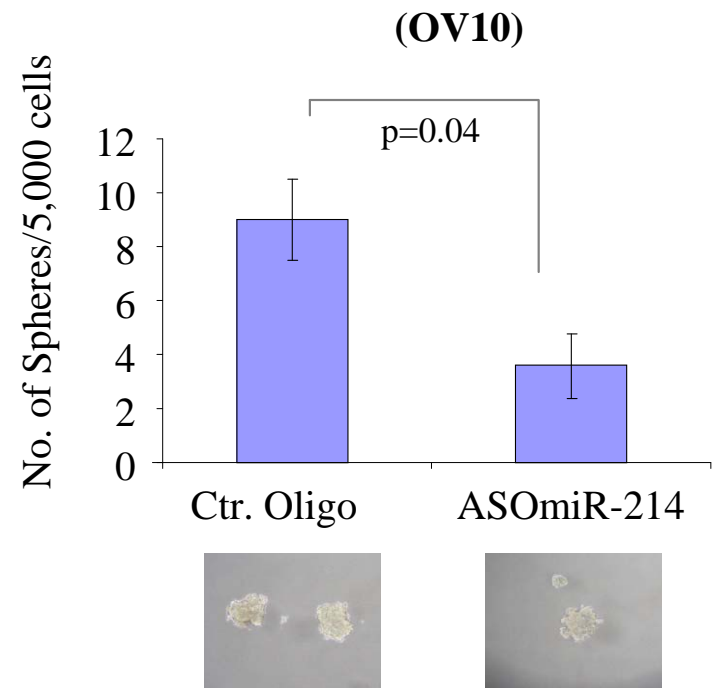

Figure S3

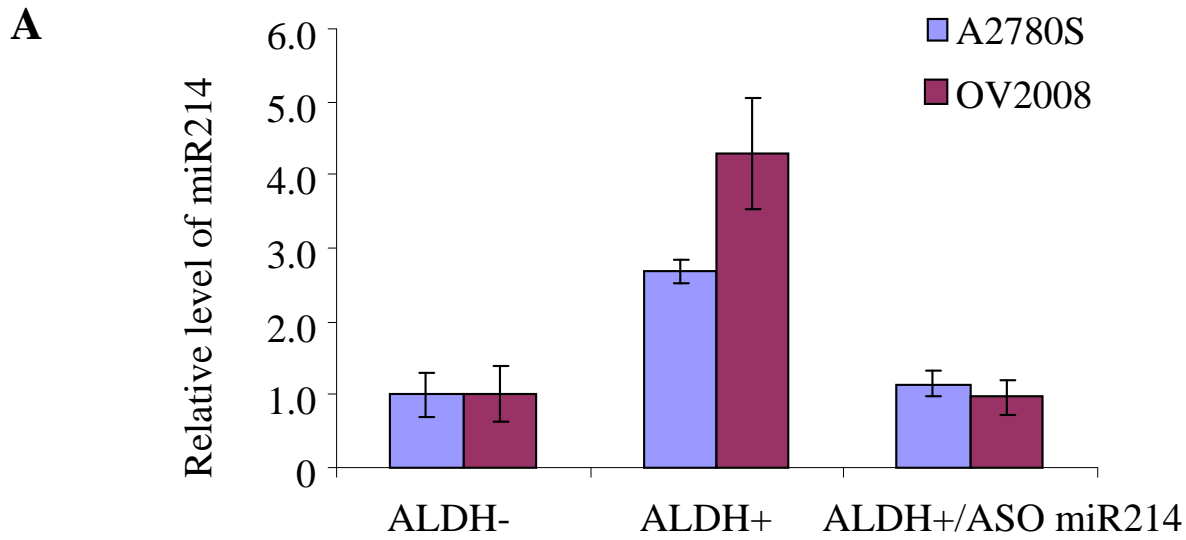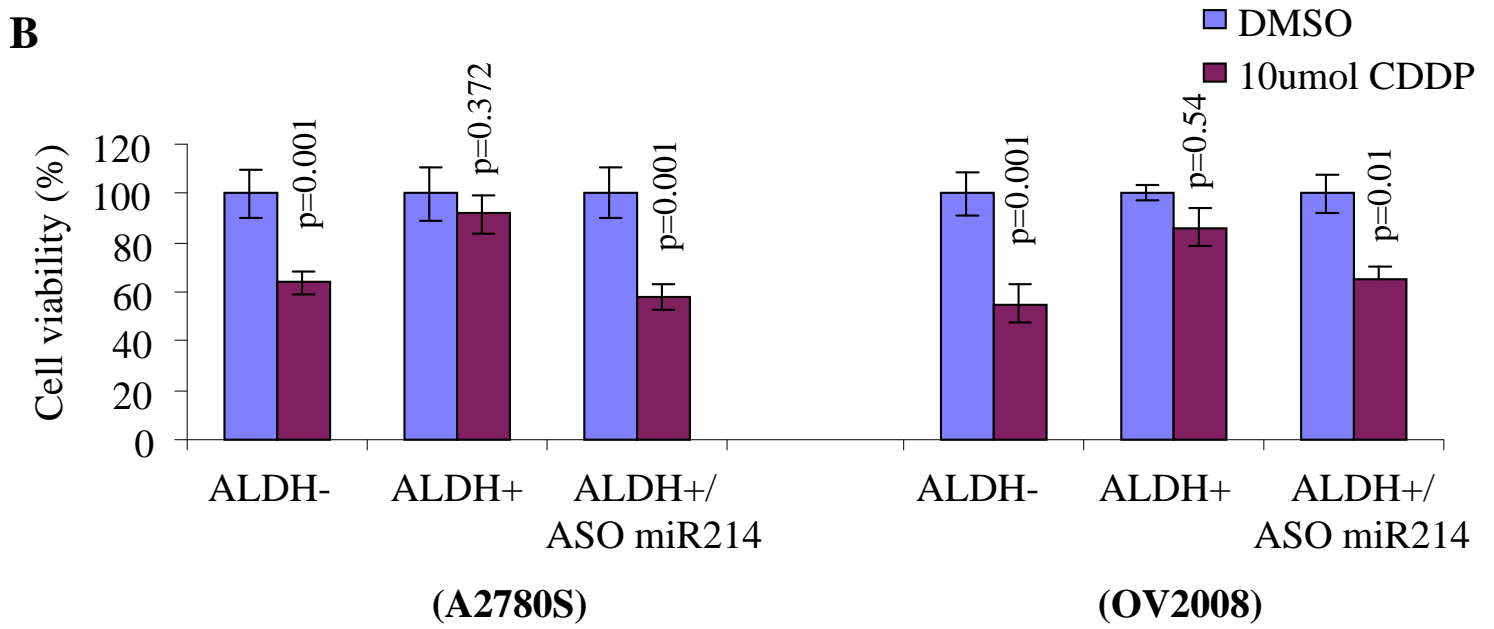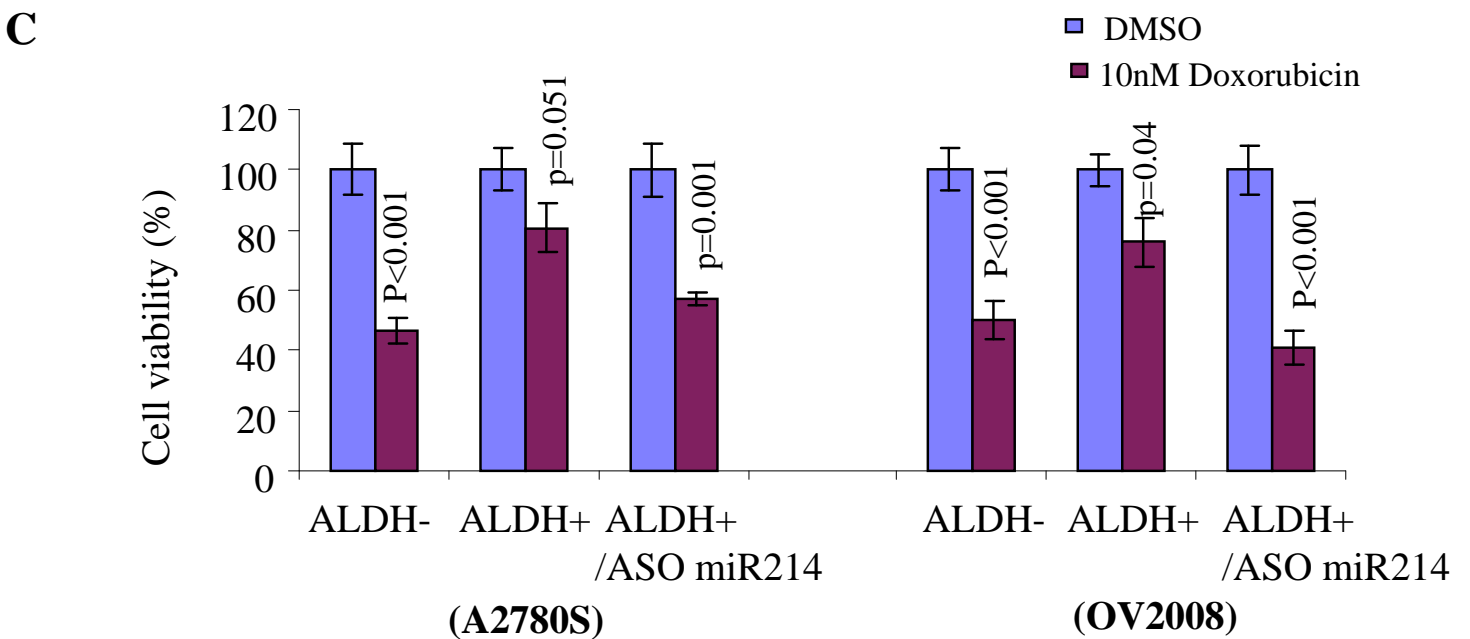

Figure S4

**A**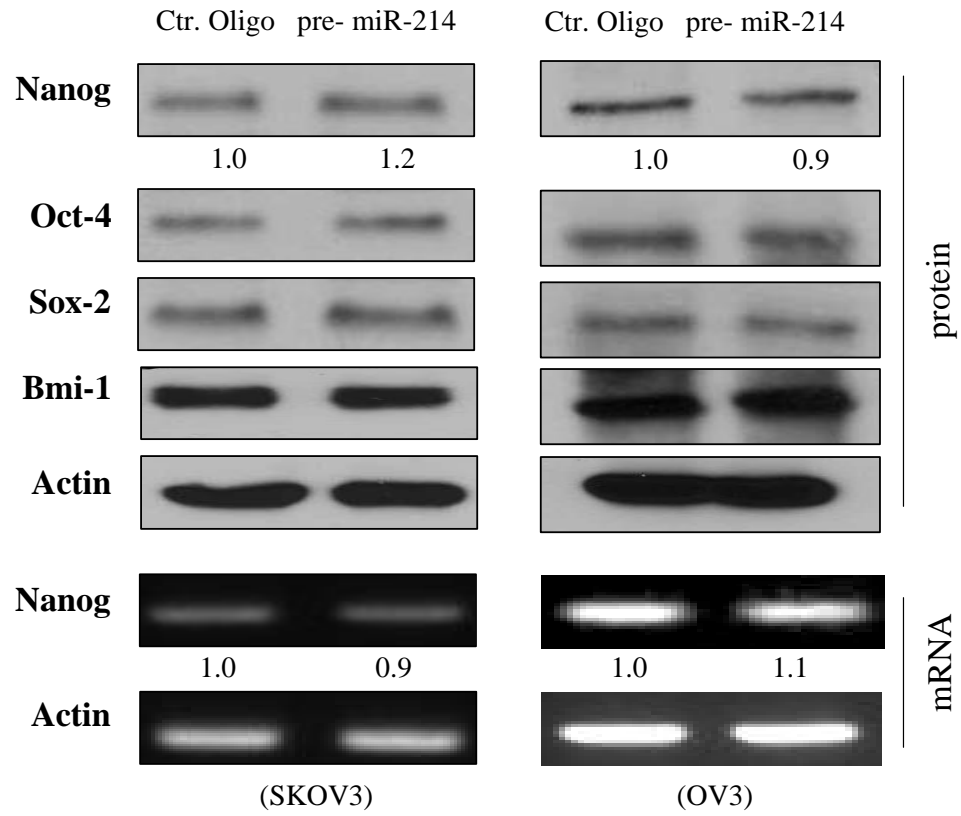**B**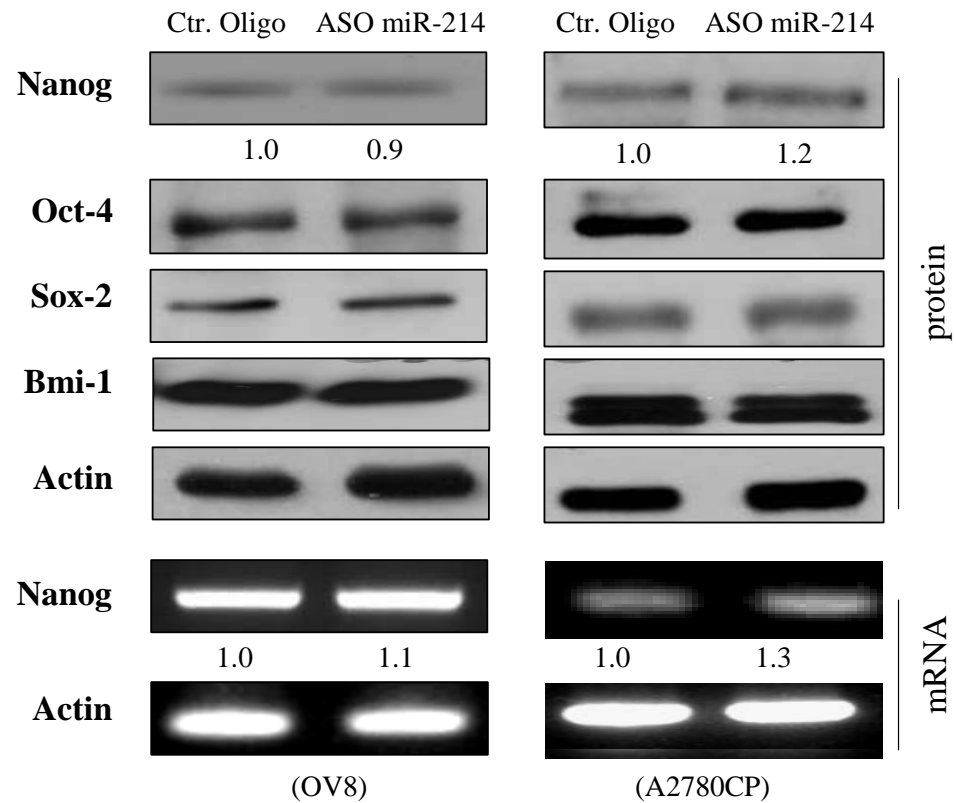

Figure S5

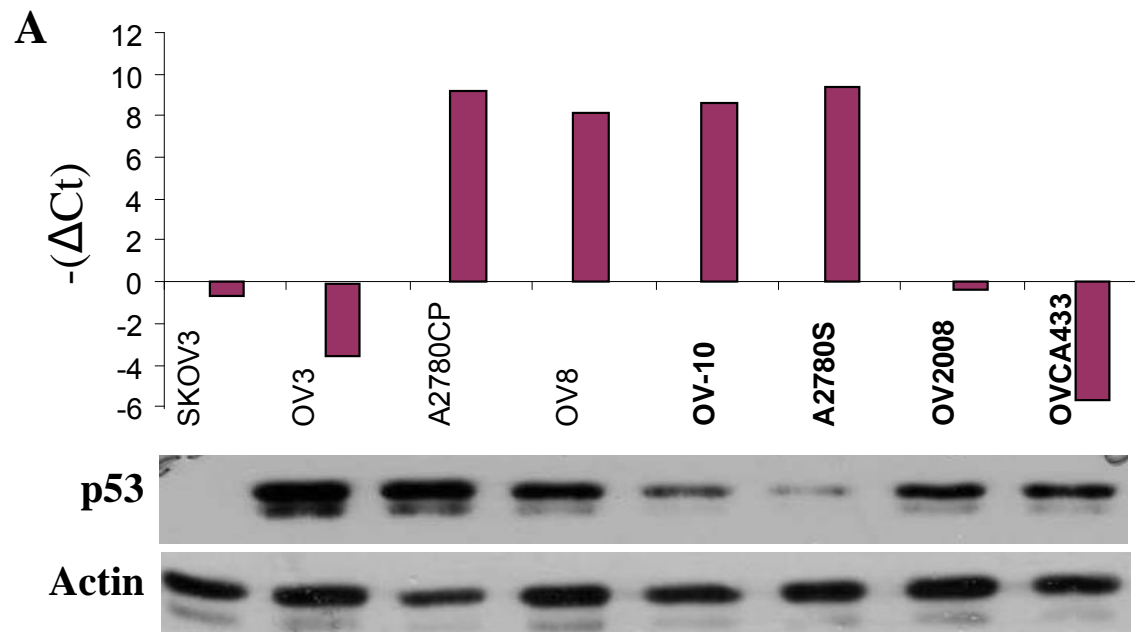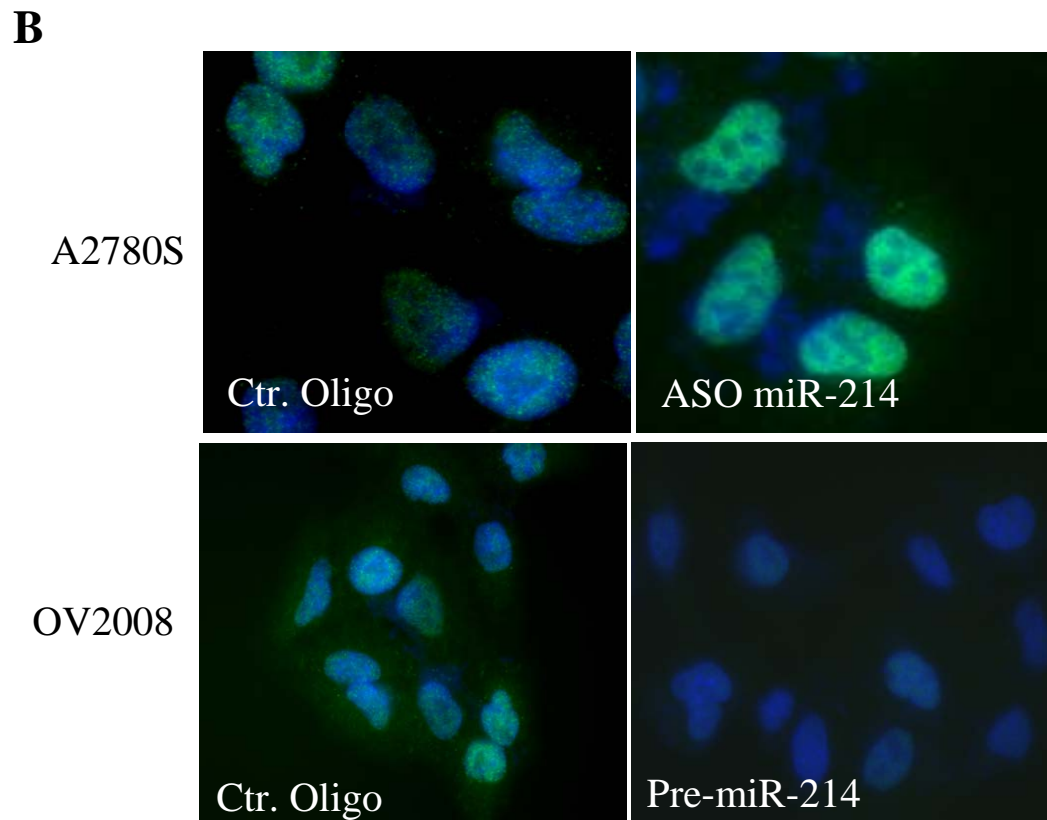

Figure S6



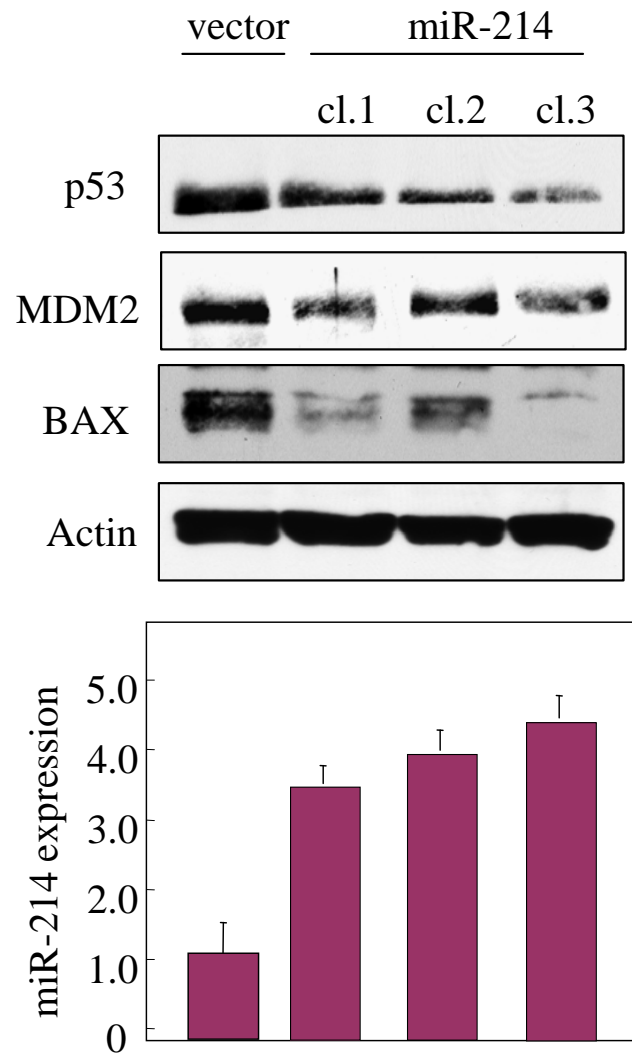

Figure S7

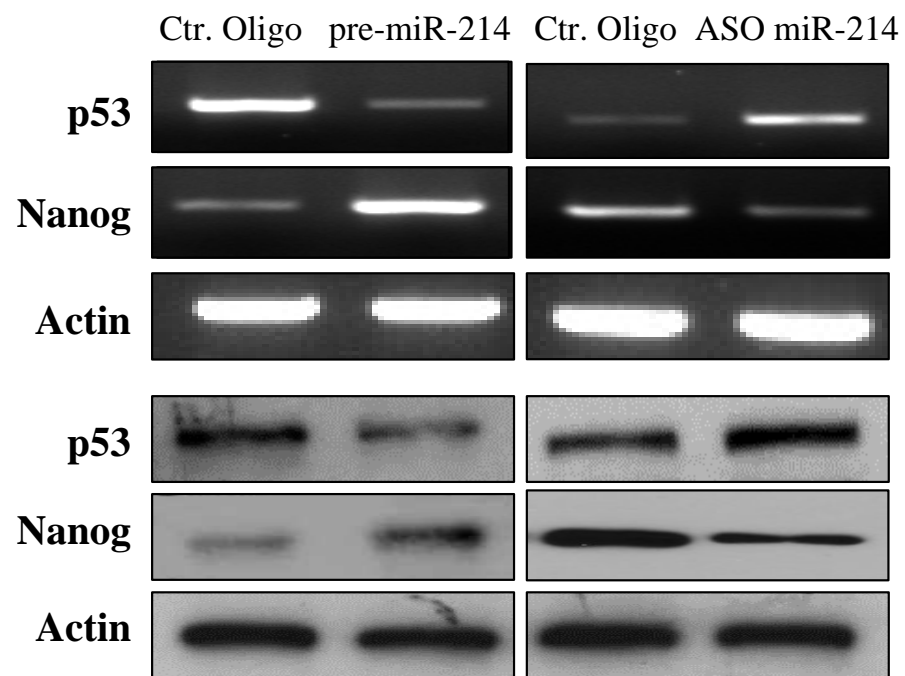

(OV10)

Figure S8

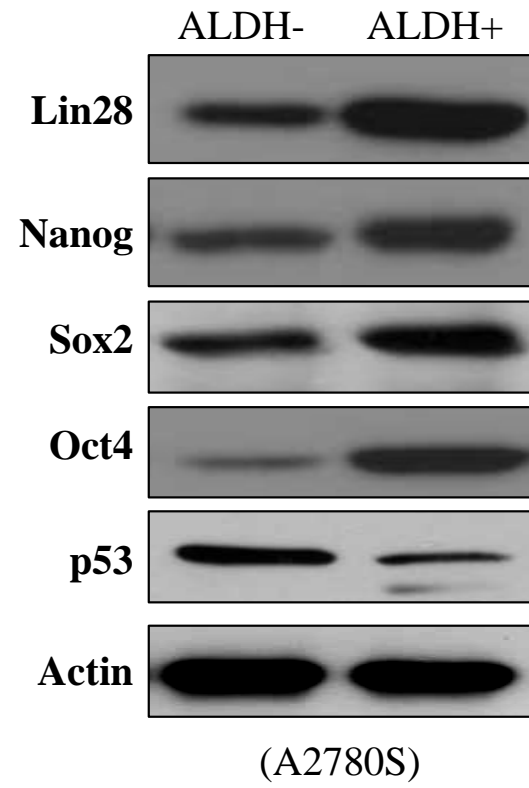

Figure S9

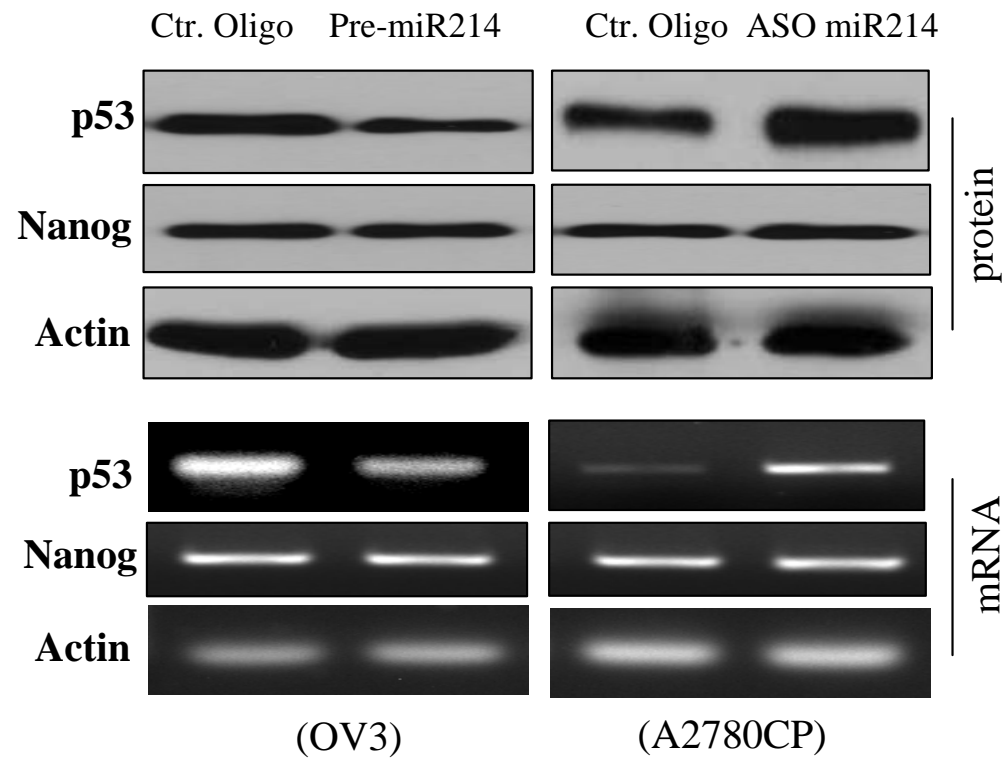

Figure S10
